# Supplementary material for: Antibacterial Activity of the Alkaloid-Enriched Extract from Prosopis juliflora Pods and Its Influence on in Vitro Ruminal Digestion
Source: Int J Mol Sci. 2013 Apr 17;14(4):8496–516. doi: 10.3390/ijms14048496 (PMC3645758; doi:10.3390/ijms14048496)
Supplement: Supplementary file 1 [file ijms-14-08496-s001.pdf]

## Supplementary Information

**Table S1.** Cumulative gas production from degradation of fast fraction (mL/g of DM) estimated by dual-pool model from samples containing increasing concentrations of BCE (mg/L) or monensin (Mon, 5  $\mu$ M) along 36 h of incubation.

| Time (h) | Cumulative Gas Production from Degradation of Fast Fraction (mL/g of DM) * |                               |                                 |                                 |                                 |                                 |
|----------|----------------------------------------------------------------------------|-------------------------------|---------------------------------|---------------------------------|---------------------------------|---------------------------------|
|          | Mon                                                                        | 0                             | 25                              | 50                              | 100                             | 200                             |
| 2        | 0.001 $\pm$ 0.00 <sup>a</sup>                                              | 0.259 $\pm$ 0.08 <sup>b</sup> | 0.111 $\pm$ 0.02 <sup>b,c</sup> | 0.112 $\pm$ 0.02 <sup>b,c</sup> | 0.109 $\pm$ 0.01 <sup>b,c</sup> | 0.085 $\pm$ 0.09 <sup>c</sup>   |
| 4        | 0.006 $\pm$ 0.00 <sup>a</sup>                                              | 0.930 $\pm$ 0.21 <sup>b</sup> | 0.489 $\pm$ 0.07 <sup>b,c</sup> | 0.525 $\pm$ 0.07 <sup>b,c</sup> | 0.478 $\pm$ 0.04 <sup>b,c</sup> | 0.288 $\pm$ 0.29 <sup>c</sup>   |
| 6        | 0.03 $\pm$ 0.01 <sup>a</sup>                                               | 3.23 $\pm$ 0.49 <sup>b</sup>  | 2.11 $\pm$ 0.17 <sup>b,c</sup>  | 2.39 $\pm$ 0.14 <sup>b,c</sup>  | 2.04 $\pm$ 0.13 <sup>b,c</sup>  | 0.97 $\pm$ 0.97 <sup>c</sup>    |
| 8        | 0.14 $\pm$ 0.04 <sup>a</sup>                                               | 9.99 $\pm$ 0.75 <sup>b</sup>  | 8.03 $\pm$ 0.15 <sup>b,c</sup>  | 9.13 $\pm$ 0.05 <sup>b</sup>    | 7.58 $\pm$ 0.46 <sup>b,c</sup>  | 3.14 $\pm$ 0.28 <sup>c</sup>    |
| 10       | 1.01 $\pm$ 0.16 <sup>a</sup>                                               | 21.14 $\pm$ 0.59 <sup>b</sup> | 22.95 $\pm$ 1.38 <sup>b</sup>   | 21.66 $\pm$ 0.25 <sup>b</sup>   | 19.26 $\pm$ 0.95 <sup>b</sup>   | 9.04 $\pm$ 0.41 <sup>c</sup>    |
| 12       | 6.48 $\pm$ 2.97 <sup>a</sup>                                               | 35.06 $\pm$ 0.61 <sup>b</sup> | 32.70 $\pm$ 2.53 <sup>b</sup>   | 30.18 $\pm$ 0.73 <sup>b</sup>   | 29.37 $\pm$ 0.92 <sup>b</sup>   | 19.42 $\pm$ 0.57 <sup>c</sup>   |
| 15       | 15.65 $\pm$ 1.58 <sup>a</sup>                                              | 41.94 $\pm$ 0.64 <sup>b</sup> | 37.83 $\pm$ 2.66 <sup>a,b</sup> | 33.36 $\pm$ 1.32 <sup>a,b</sup> | 34.07 $\pm$ 1.13 <sup>a,b</sup> | 32.11 $\pm$ 2.22 <sup>a,b</sup> |
| 18       | 19.51 $\pm$ 0.32 <sup>a</sup>                                              | 43.11 $\pm$ 0.68 <sup>a</sup> | 38.45 $\pm$ 2.60 <sup>a</sup>   | 33.71 $\pm$ 1.42 <sup>a</sup>   | 34.68 $\pm$ 1.20 <sup>a</sup>   | 36.01 $\pm$ 3.44 <sup>a</sup>   |
| 21       | 20.06 $\pm$ 0.59 <sup>a</sup>                                              | 43.28 $\pm$ 0.68 <sup>a</sup> | 38.52 $\pm$ 2.58 <sup>a</sup>   | 33.75 $\pm$ 1.44 <sup>a</sup>   | 34.75 $\pm$ 1.21 <sup>a</sup>   | 36.76 $\pm$ 3.74 <sup>a</sup>   |
| 24       | 20.11 $\pm$ 0.62 <sup>a</sup>                                              | 43.31 $\pm$ 0.69 <sup>a</sup> | 38.52 $\pm$ 2.58 <sup>a</sup>   | 33.75 $\pm$ 1.44 <sup>a</sup>   | 34.76 $\pm$ 1.21 <sup>a</sup>   | 36.89 $\pm$ 3.80 <sup>a</sup>   |
| 30       | 20.12 $\pm$ 0.62 <sup>a</sup>                                              | 43.31 $\pm$ 0.69 <sup>a</sup> | 38.53 $\pm$ 2.58 <sup>a</sup>   | 33.75 $\pm$ 1.44 <sup>a</sup>   | 34.76 $\pm$ 1.21 <sup>a</sup>   | 36.92 $\pm$ 3.81 <sup>a</sup>   |
| 36       | 20.12 $\pm$ 0.62 <sup>a</sup>                                              | 43.31 $\pm$ 0.69 <sup>a</sup> | 38.53 $\pm$ 2.58 <sup>a</sup>   | 33.75 $\pm$ 1.44 <sup>a</sup>   | 34.76 $\pm$ 1.21 <sup>a</sup>   | 36.92 $\pm$ 3.81 <sup>a</sup>   |

\* Means  $\pm$  Standard Deviation. Means followed by the same minuscule letter within each time period did not differ by contrasts ( $p > 0.05$ ). Analysis of variance (Treatment:  $p < 0.0001$ , Time:  $p < 0.0001$ , Time  $\times$  treatment:  $p < 0.0001$ ).

**Table S2.** Cumulative gas production from degradation of slow fraction (mL/g of DM) estimated by dual-pool model from samples containing increasing concentrations of BCE (mg/L) or monensin (Mon, 5  $\mu$ M) along 36 h of incubation.

| Time (h) | Cumulative Gas Production from Degradation of Slow Fraction (mL/g of DM) * |                                 |                                 |                               |                                 |                                 |
|----------|----------------------------------------------------------------------------|---------------------------------|---------------------------------|-------------------------------|---------------------------------|---------------------------------|
|          | Mon                                                                        | 0                               | 25                              | 50                            | 100                             | 200                             |
| 2        | 1.85 $\pm$ 0.11 <sup>a</sup>                                               | 5.39 $\pm$ 0.36 <sup>a</sup>    | 4.30 $\pm$ 0.85 <sup>a</sup>    | 4.55 $\pm$ 0.14 <sup>a</sup>  | 4.27 $\pm$ 0.11 <sup>a</sup>    | 3.46 $\pm$ 0.26 <sup>a</sup>    |
| 4        | 2.88 $\pm$ 0.18 <sup>a</sup>                                               | 7.46 $\pm$ 0.50 <sup>b</sup>    | 6.03 $\pm$ 1.18 <sup>b,c</sup>  | 6.62 $\pm$ 0.20 <sup>b</sup>  | 6.19 $\pm$ 0.162 <sup>b,c</sup> | 4.86 $\pm$ 0.41 <sup>c</sup>    |
| 6        | 4.44 $\pm$ 0.30 <sup>a</sup>                                               | 10.23 $\pm$ 0.68 <sup>b</sup>   | 8.39 $\pm$ 1.61 <sup>b,c</sup>  | 9.51 $\pm$ 0.28 <sup>b</sup>  | 8.88 $\pm$ 0.24 <sup>b,c</sup>  | 6.79 $\pm$ 0.64 <sup>c</sup>    |
| 8        | 6.79 $\pm$ 0.48 <sup>a</sup>                                               | 13.88 $\pm$ 0.91 <sup>b</sup>   | 11.53 $\pm$ 2.18 <sup>b,c</sup> | 13.47 $\pm$ 0.39 <sup>b</sup> | 12.58 $\pm$ 0.35 <sup>b</sup>   | 9.40 $\pm$ 0.99 <sup>c</sup>    |
| 10       | 10.26 $\pm$ 0.78 <sup>a</sup>                                              | 18.54 $\pm$ 1.20 <sup>b</sup>   | 15.61 $\pm$ 2.92 <sup>b,c</sup> | 18.70 $\pm$ 0.55 <sup>b</sup> | 17.48 $\pm$ 0.49 <sup>b</sup>   | 12.86 $\pm$ 1.49 <sup>a,c</sup> |
| 12       | 15.23 $\pm$ 1.17 <sup>a</sup>                                              | 24.30 $\pm$ 1.53 <sup>b</sup>   | 20.71 $\pm$ 3.81 <sup>b,c</sup> | 25.29 $\pm$ 0.75 <sup>b</sup> | 23.70 $\pm$ 0.68 <sup>b</sup>   | 17.31 $\pm$ 2.17 <sup>c</sup>   |
| 15       | 26.21 $\pm$ 1.96 <sup>a</sup>                                              | 34.92 $\pm$ 2.10 <sup>b</sup>   | 30.20 $\pm$ 5.45 <sup>b,c</sup> | 37.41 $\pm$ 1.11 <sup>b</sup> | 35.30 $\pm$ 1.05 <sup>b</sup>   | 25.95 $\pm$ 3.53 <sup>c</sup>   |
| 18       | 41.47 $\pm$ 2.75 <sup>a,b</sup>                                            | 47.16 $\pm$ 2.66 <sup>a,b</sup> | 41.19 $\pm$ 7.31 <sup>a,b</sup> | 50.84 $\pm$ 1.48 <sup>a</sup> | 48.40 $\pm$ 1.49 <sup>a</sup>   | 36.58 $\pm$ 5.14 <sup>b</sup>   |
| 21       | 59.02 $\pm$ 3.07 <sup>a,b</sup>                                            | 59.55 $\pm$ 3.10 <sup>a,b</sup> | 52.24 $\pm$ 9.16 <sup>a,b</sup> | 63.35 $\pm$ 1.78 <sup>a</sup> | 60.90 $\pm$ 1.93 <sup>a,b</sup> | 48.06 $\pm$ 6.65 <sup>b</sup>   |
| 24       | 75.37 $\pm$ 2.73 <sup>a</sup>                                              | 70.55 $\pm$ 3.38 <sup>a</sup>   | 61.91 $\pm$ 10.77 <sup>a</sup>  | 73.28 $\pm$ 1.99 <sup>a</sup> | 71.06 $\pm$ 2.29 <sup>a</sup>   | 58.81 $\pm$ 7.71 <sup>a</sup>   |
| 30       | 96.05 $\pm$ 1.47 <sup>a</sup>                                              | 85.52 $\pm$ 3.54 <sup>a</sup>   | 74.61 $\pm$ 12.93 <sup>a</sup>  | 84.61 $\pm$ 2.23 <sup>a</sup> | 82.95 $\pm$ 2.74 <sup>a</sup>   | 74.24 $\pm$ 8.37 <sup>a</sup>   |
| 36       | 103.55 $\pm$ 1.16 <sup>a</sup>                                             | 92.45 $\pm$ 3.52 <sup>a</sup>   | 80.19 $\pm$ 13.91 <sup>a</sup>  | 88.77 $\pm$ 2.33 <sup>a</sup> | 87.43 $\pm$ 2.91 <sup>a</sup>   | 81.66 $\pm$ 8.15 <sup>a</sup>   |

\* Means  $\pm$  Standard Deviation. Means followed by the same minuscule letter within each time period did not differ by contrasts ( $p > 0.05$ ). Analysis of variance (Treatment:  $p < 0.0001$ , Time:  $p < 0.0001$ , Time  $\times$  treatment:  $p < 0.0001$ ).
